# Supplementary material
Source: ML conference proceedings conference paper supplement (https://openreview.net/forum?id=V8YXffoDUSa)

Batchnorm initialization    $\bullet$ —  $\gamma=1$     $\blacktriangle$ - -  $\gamma=0.1$    # channels    $\bullet$ — 8    $\bullet$ — 16    $\bullet$ — 32    $\bullet$ — 64

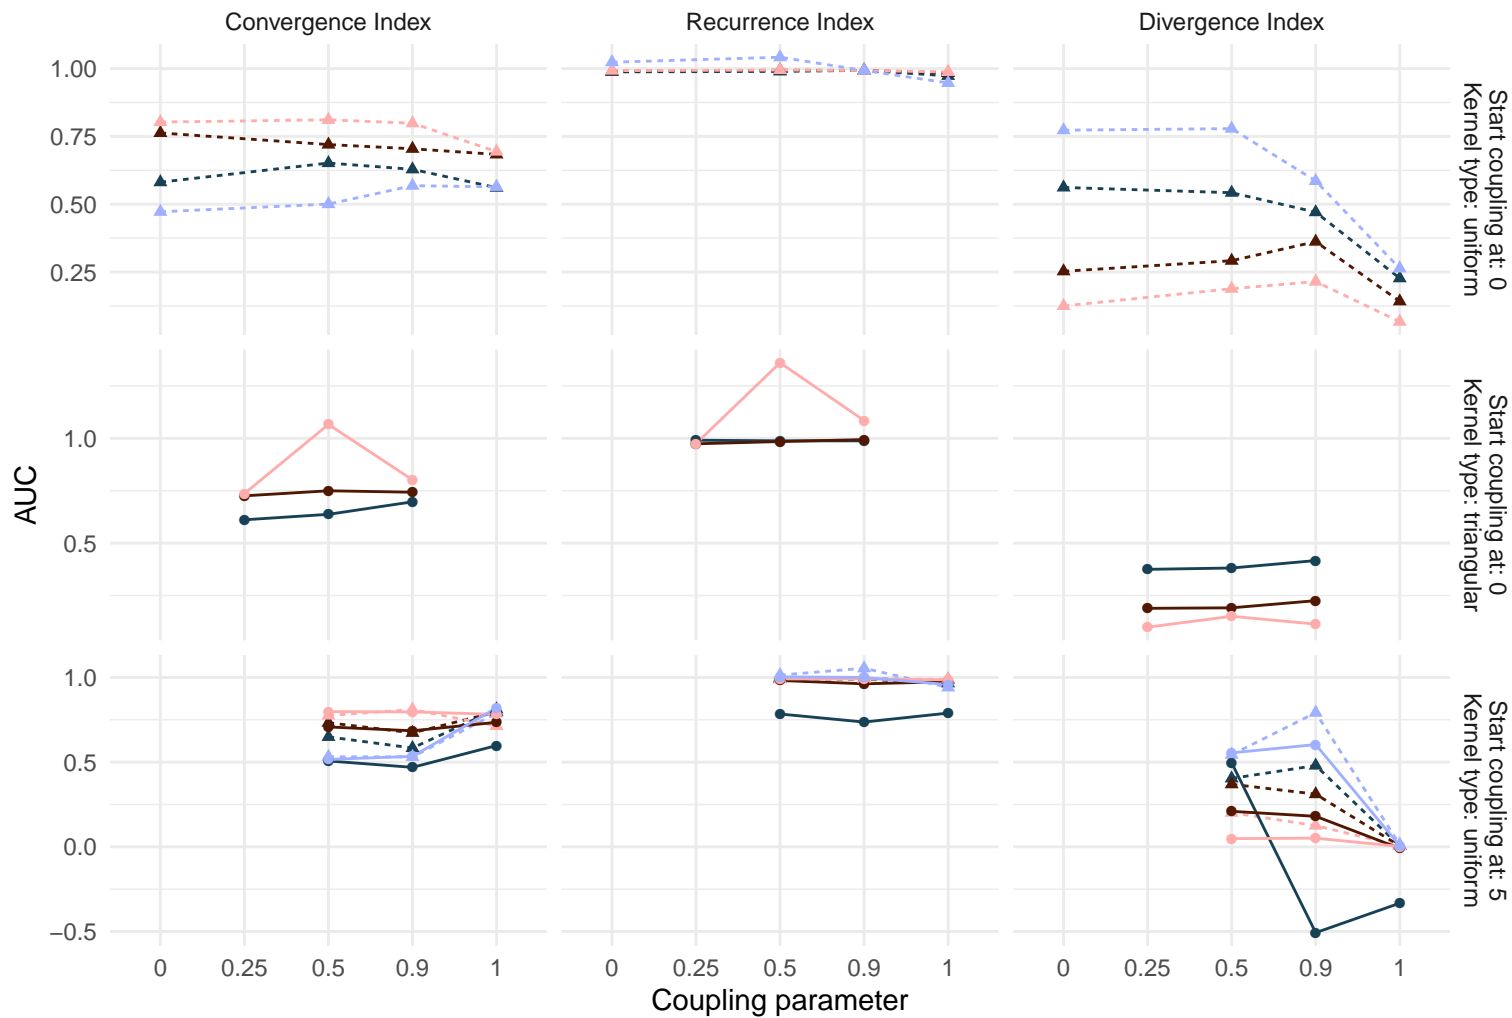

Supplement: supplementary_material [file attachment]
