# Supplementary material
Source: ML conference proceedings conference paper supplement (https://openreview.net/forum?id=V8YXffoDUSa)

# effective parameters

$10^7$

$10^5$

$10^5$

$10^7$

# raw parameters

Coupling parameter (Initialization)

- 0 (non-rec.)
- 0 (rec.)
- 0.25 (rec.)
- 0.5 (rec.)
- 0.9 (rec.)
- 1 (rec.)

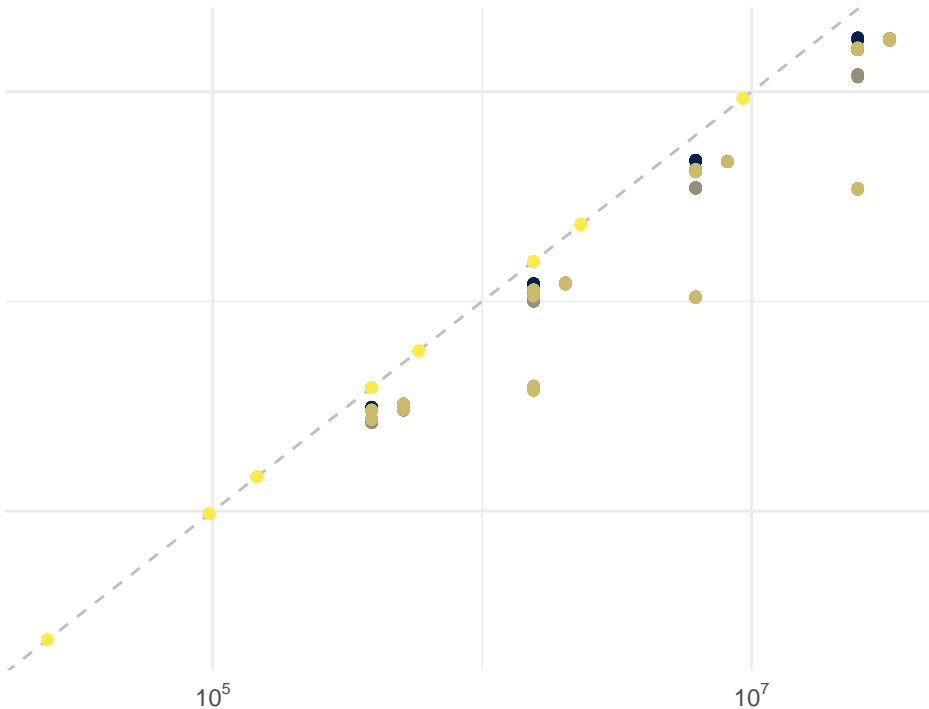

Supplement: supplementary_material [file attachment]
