# Supplementary material
Source: ML conference proceedings conference paper supplement (https://openreview.net/forum?id=V8YXffoDUSa)

Error rate on CIFAR-10

Training data

Validation data

Coupling parameter (Initialization)

— 0 (non-rec.)

— 0 (rec.)

— 0.5 (rec.)

— 0.9 (rec.)

— 1 (rec.)

Epoch

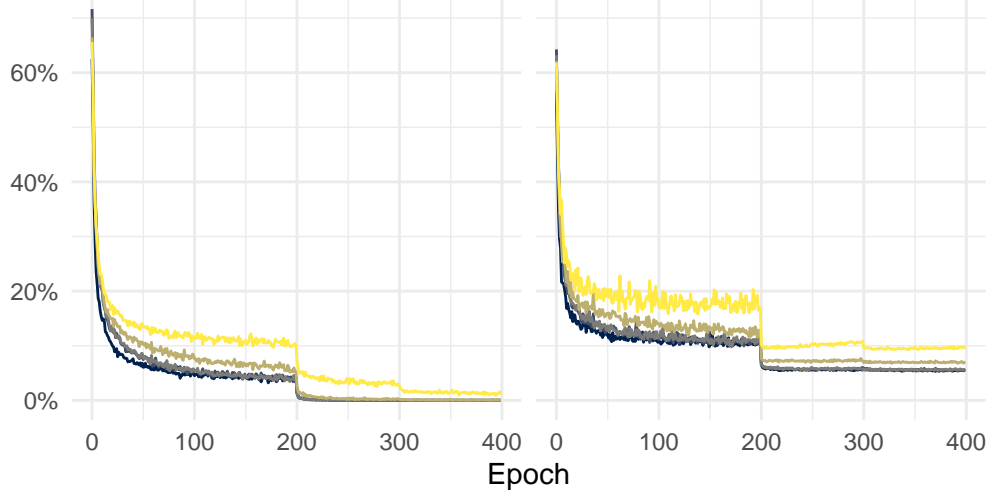

Supplement: supplementary_material [file attachment]
