# Supplementary material
Source: ML conference proceedings conference paper supplement (https://openreview.net/forum?id=V8YXffoDUSa)

a

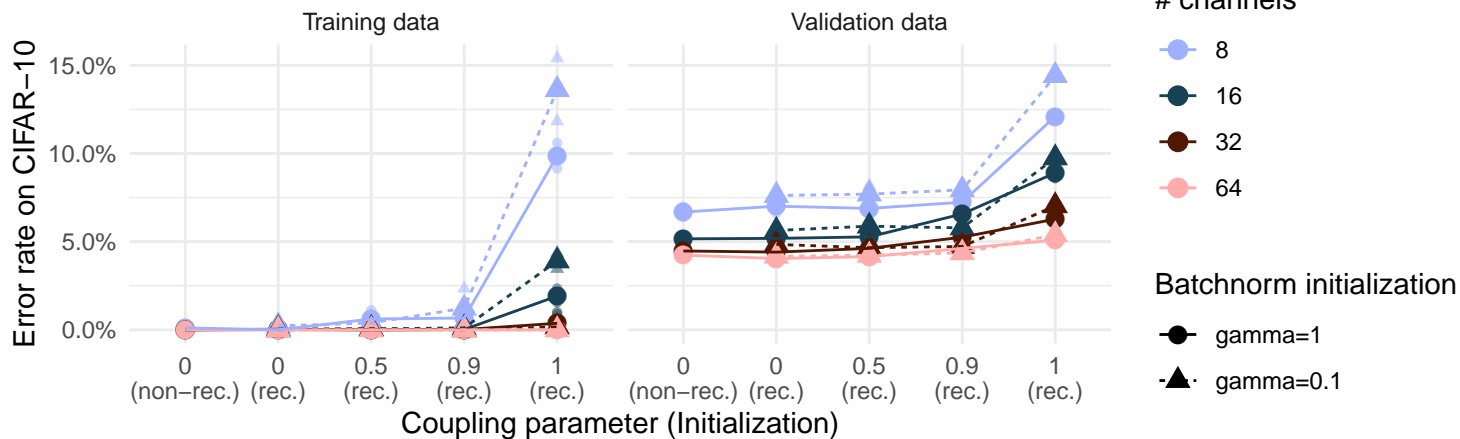

b

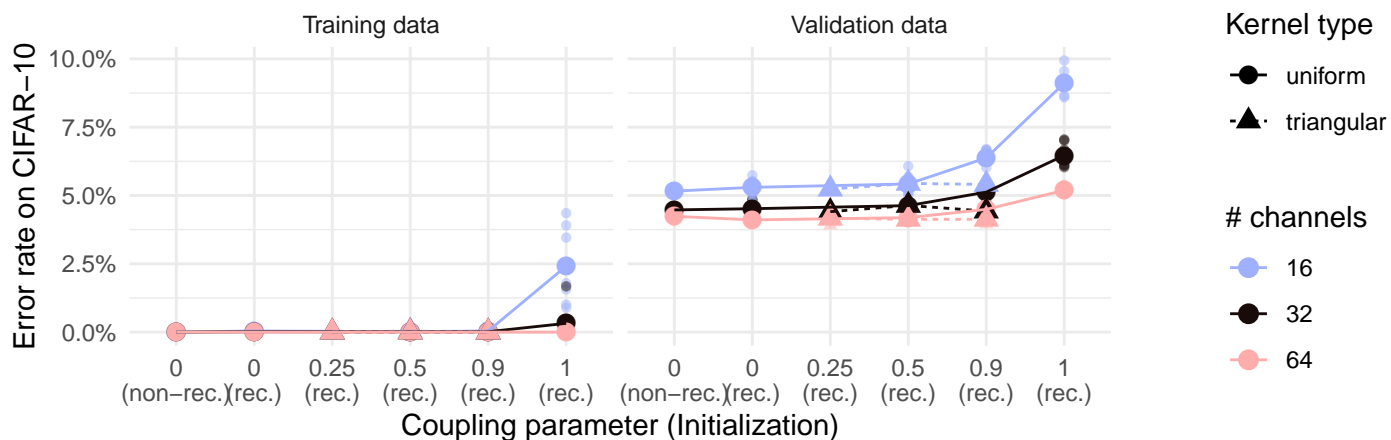

c

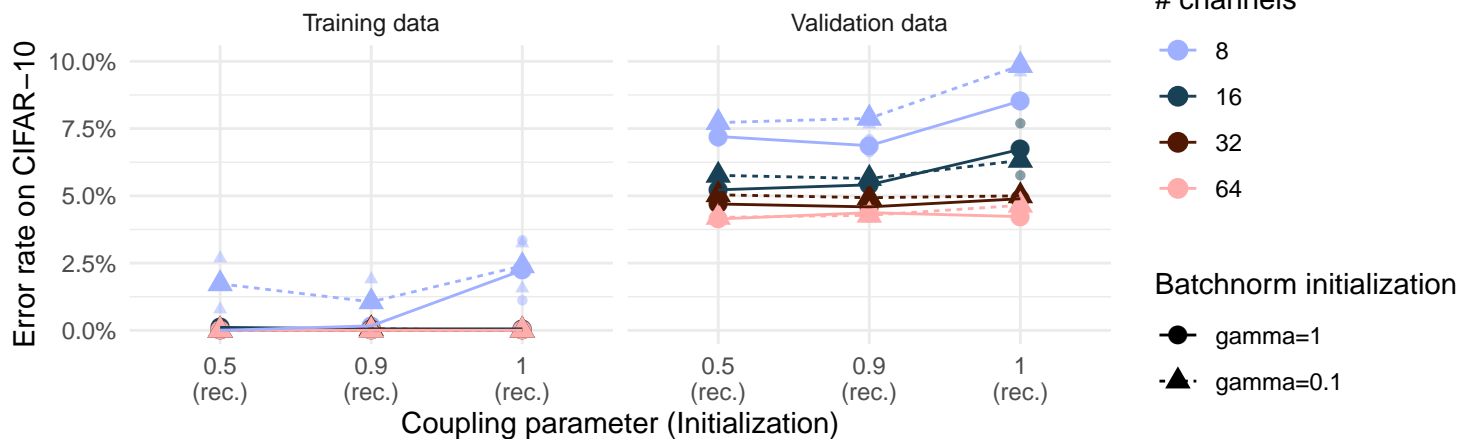

Supplement: supplementary_material [file attachment]

Error rate on CIFAR-10

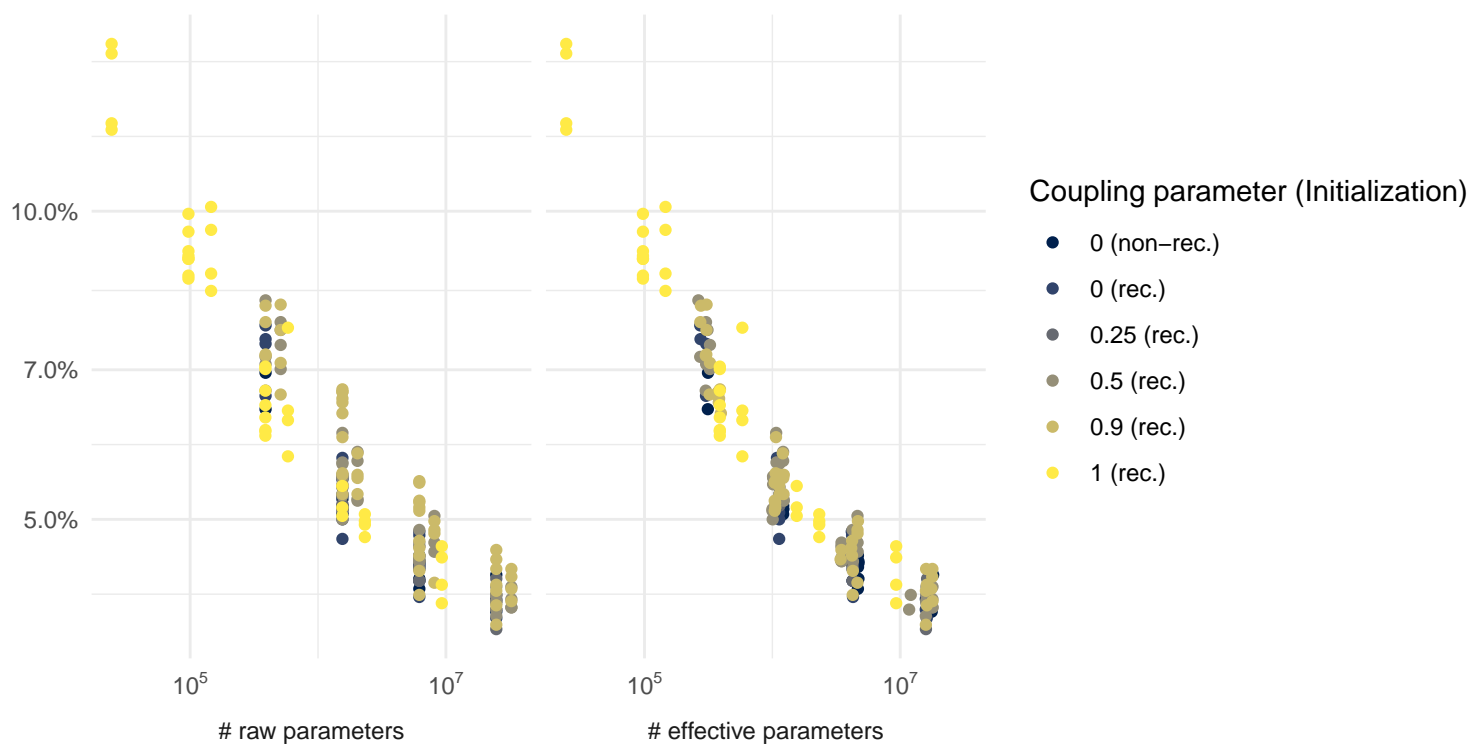

Supplement: supplementary_material [file attachment]

Error rate on CIFAR-10

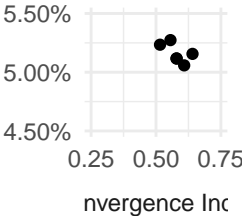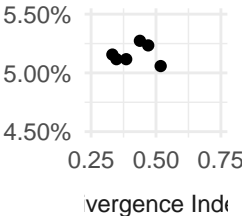

Supplement: supplementary_material [file attachment]

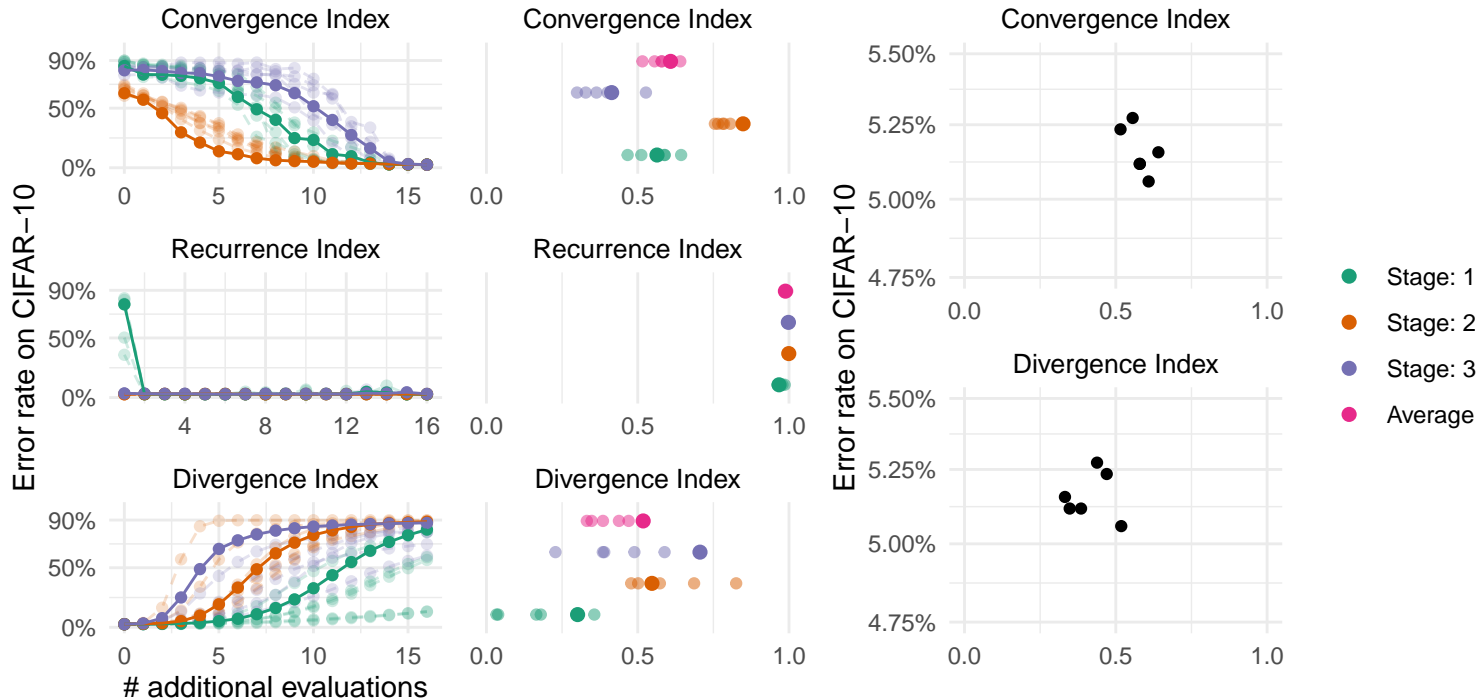

Supplement: supplementary_material [file attachment]

# channels 8 16 32 64

# parameters

$10^5$   $10^7$

Coupling parameter 0 (non-rec.) 0 (rec.) 0.5 (rec.) 0.9 (rec.) 1 (rec.)

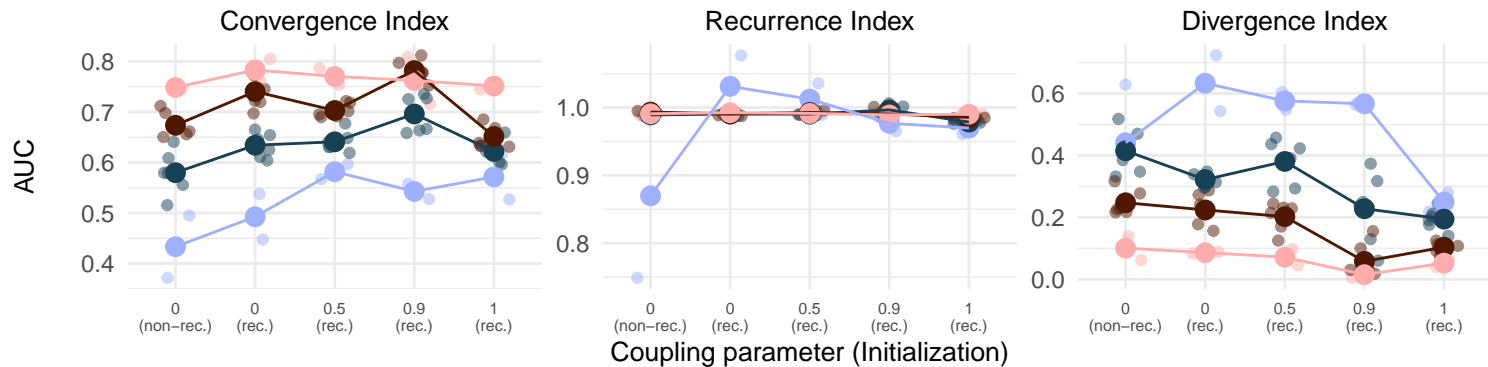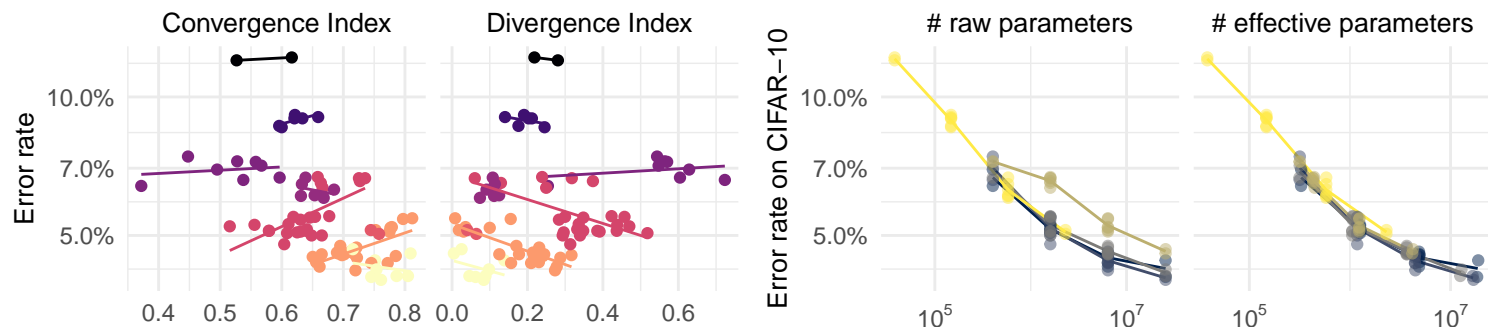

Supplement: supplementary_material [file attachment]
